# Supplementary material
Source: PubMed Central journal article supplement (PMC10511001)

## Supplementary Information (SI) Guide:

### SI Figures

#### SI Fig. 1: Kinetics of *BATF3* and *MYC* expression in WT and *TET2*-edited CAR T cells.

**a**, Differentially accessible genomic regions between *TET2*<sub>bed</sub> Rv-1928z+41BBL and WT Rv-1928z+41BBL. Both samples were isolated from mice at day 90. The red dots are peaks with |fold change| >1.5 and (p<sub>adj</sub><0.1). **b**, Differential genomic accessibility in *BATF3* and *MYC* regions ([*TET2*<sub>bed</sub>/WT Rv-1928z+41BBL]; p<sub>adj</sub><0.05). p values in **a,b** are adjusted for multiple comparisons by BKY method. **c**, Schematic of *in vitro* repeated rechallenge assay for *BATF3* and *MYC* FACS analysis. **d**, CAR T cells were cultured with (stimulated) or without (unstimulated) irradiated 3T3-CD19. 24 hours later, *BATF3* and *MYC* intracellular FACS was performed on pooled CAR T cells (pooled from 3 wells) for each condition. **e**, Kinetic analysis of *BATF3* (top) and *MYC* (bottom) expression for Rv-1928z+41BBL CAR T cells. Fraction of positive cells is represented in red font; MFI is represented in green font. **f, g**, Day 15 *BATF3* (**f**) and *MYC* (**g**) population fractions for WT and *TET2*-edited Rv-1928z+41BBL CAR T cells. p values in **f,g** were determined through two-sided  $\chi^2$  test. Exact p values are available in SI Table 4.

#### SI Fig. 2: JQ1 and dexamethasone treatment inhibit *TET2*<sub>bed</sub> CAR T cell proliferation.

**a**, *BATF3* gRNA targeting site (left panel). Pre-infusion CAR T cell *BATF3* flow cytometry quantification. MFI is indicated. **b-d**, Schematics of the cell proliferation assay (**b**). The cells were either treated with DMSO, JQ1 (500nM) or dexamethasone (dexa, 1 $\mu$ m). DMSO normalized cell counts for JQ1 (**c**) and dexa (**d**). p-values were determined by two-sided

unpaired t-test (**c, d**). **e-g**, Schematics of qPCR study (**e**). CAR T cells were treated with DMSO, JQ1 or dexamethasone at the same dose as cell proliferation assay for 12 hours. Transcripts were normalized to *B2M* for each sample. DMSO normalized *BATF3* and *MYC* levels under JQ1 treatment (**f**) and dexamethasone (**g**). Multiple unpaired unpaired t-tests corrected by BKY method (**f, g**). Data in **c, d, f, g** is presented as mean±SD. (n=4). p<0.05 was considered statistically significant. p values are denoted: p>0.05, not significant, NS; \*, p<0.05; \*\*, p< 0.01; \*\*\*, p<0.001; \*\*\*\*, p<0.0001. Exact p values are available in SI Table 4.

**SI Fig. 3: Effector loci accessibility in long-term persisting WT and *TET2<sub>bed</sub>* CAR T cells.**

**a-d**, Genome accessibility in WT and *TET2<sub>bed</sub>* CAR T cells for *IL2* (**a**), *GZMB* (**b**), *IFNG* (**c**), and *TNF* (**d**). These genome accessibility tracks are representative of n=3.

**SI Fig. 4: Flow Cytometry gating strategy.**

**a**, Gating strategy for Extended Data Fig. 1a, 1b, 2a and 2b (left panel). **b**, Gating strategy for Extended Data Fig. 1a, 1b, 2a, 2b (right panel), 1g, 2e and 3a. **c**, Gating strategy for Extended Data Fig. 1i, 2g and 3c. **d**, Gating strategy for Fig. 5f. **e**, Gating strategy for Extended Data Fig. 8l.

**SI Table Titles**

**SI Table 1: Exome analysis of hyper-proliferative *TET2<sub>bed</sub>* CAR T cells.**

**1a**, Translocation analysis in *TET2<sub>bed</sub>* hyper-proliferative CAR T cells. **1b**, Mutation analysis in *TET2<sub>bed</sub>* hyper-proliferative CAR T cells. **1c**, Copy number analysis in *TET2<sub>bed</sub>* hyper-proliferative CAR T cells.

**SI Table 2: Retroviral integration site analysis in hyper-proliferative *TET2<sup>bed</sup>* CAR T cells.**  
**2a**, Retrovirus integration site analysis for *TET2<sup>bed</sup>* Rv-1928z+41BBL (17-1). **2b**, Retrovirus integration site analysis for *TET2<sup>bed</sup>* Rv-1928z (2-2).

**SI Table 3: Replicate information on representative figures.**

**3a-d**, Replicate information for selected panels in Extended Data Fig. 1 (**a**), Extended Data Fig. 2 (**b**), Extended Data Fig. 3 (**c**), and Extended Data Fig. 8 (**d**).

**SI Table 4: Exact p values for figures.**

**4a-i**, Exact p values for selected panels in Fig. 2 (**a**), Fig. 4 (**b**), Fig. 5 (**c**), Extended Data Fig. 1 (**d**), Extended Data Fig. 4 (**e**), Extended Data Fig. 8 (**f**), Extended Data Fig. 10 (**g**), SI Fig. 1 (**h**), SI Fig. 2 (**i**).

**SI Table 5: List of antibodies used in the flow cytometry.**

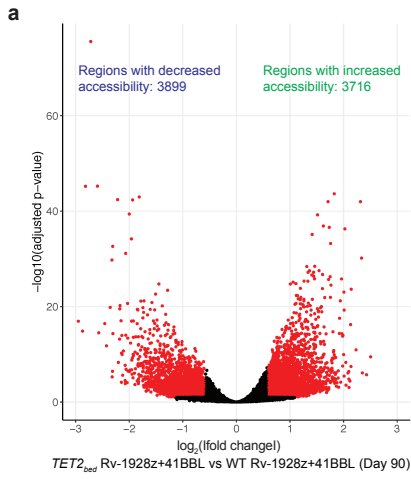

**b**

| BATF3                     |             |                  |             |             |          |  |
|---------------------------|-------------|------------------|-------------|-------------|----------|--|
| region                    | baseMean    | log2(FoldChange) | lfcSE       | padj        | distance |  |
| Chr1: 212698931-212700763 | 367.594042  | 0.779699416      | 0.118779277 | 5.15E-09    | 0        |  |
| Chr1: 212691505-212692274 | 76.48321453 | 1.387572691      | 0.226312834 | 6.29E-08    | 77.12    |  |
| Chr1: 212697149-212697351 | 16.65639557 | 1.328313103      | 0.449082429 | 0.025786478 | 26.35    |  |
| MYC                       |             |                  |             |             |          |  |
| Chr8: 127733639-127739180 | 866.4256011 | 0.654547727      | 0.108930937 | 1.24E-07    | 0        |  |
| Chr8: 128240088-128240842 | 127.2572027 | 0.885809796      | 0.170965886 | 8.51E-06    | -504655  |  |
| Chr8: 128298313-128299429 | 92.70707583 | 0.855069117      | 0.201923454 | 0.000469664 | -562880  |  |
| Chr8: 128070065-128070549 | 70.30376769 | 0.76244445       | 0.218212186 | 0.005834982 | -334632  |  |
| Chr8: 128540410-128541456 | 149.6362575 | 0.592900353      | 0.171427424 | 0.006508655 | -804977  |  |
| Chr8: 128076678-128077354 | 93.32698554 | 0.679631031      | 0.205552617 | 0.010170037 | -341245  |  |
| Chr8: 128078292-128078558 | 24.79958049 | 1.154992909      | 0.365992552 | 0.015449671 | -342859  |  |
| Chr8: 128657313-128657875 | 86.82943888 | 0.630751681      | 0.201528077 | 0.016564504 | -921880  |  |
| Chr8: 127963134-127963657 | 46.0053605  | 0.808901717      | 0.260841767 | 0.017859574 | -227701  |  |
| Chr8: 128338716-128339162 | 36.71976028 | 0.885855782      | 0.295396593 | 0.02327404  | -603283  |  |
| Chr8: 128668823-128669069 | 25.28793685 | 0.984485442      | 0.363342827 | 0.046241898 | -933390  |  |
| Chr8: 128184558-128185194 | 64.50611487 | 0.605748536      | 0.225118266 | 0.048182484 | -449125  |  |

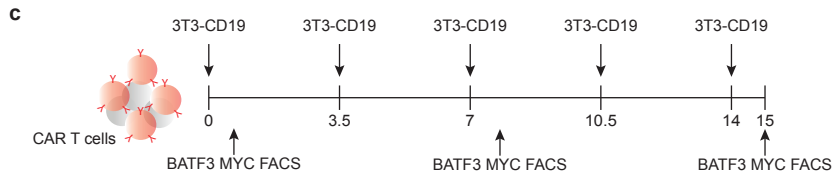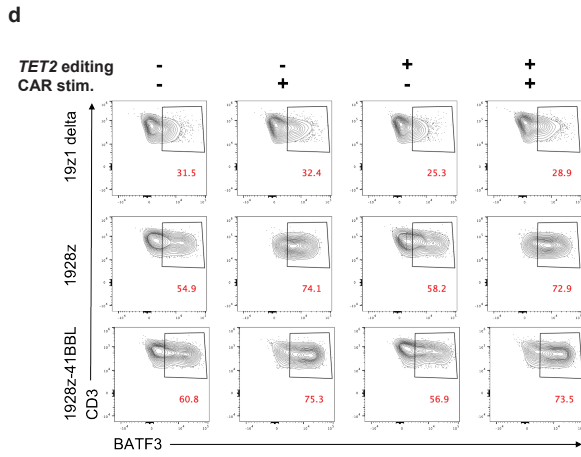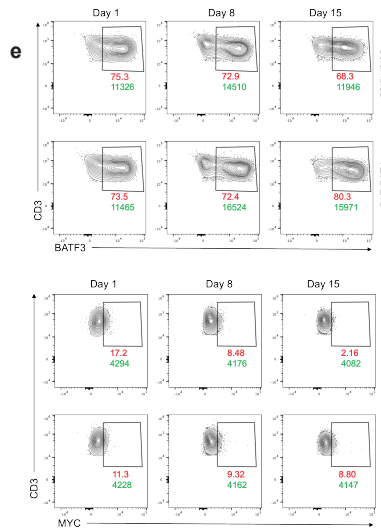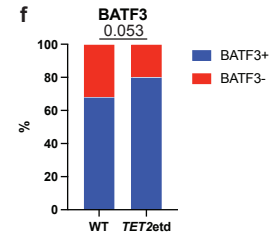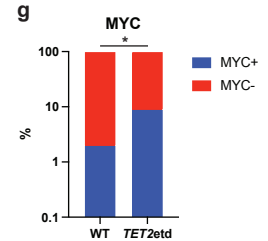

**a**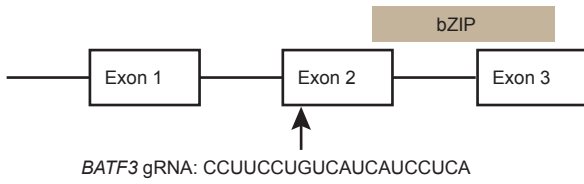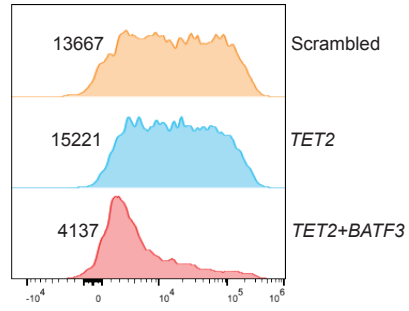**b**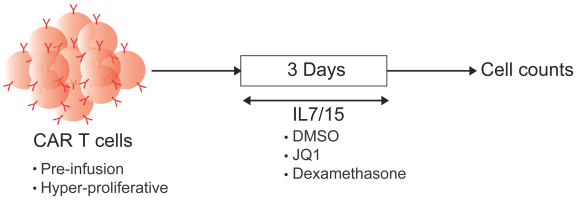**e**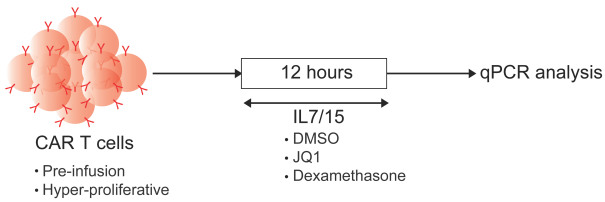**c**

Pre-infusion  $TET2_{etd}$  TRAC-1928z

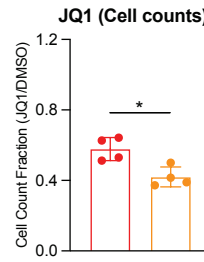**d**

$TET2_{bsd}$  TRAC-1928z (Day 75)

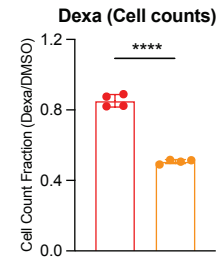**f**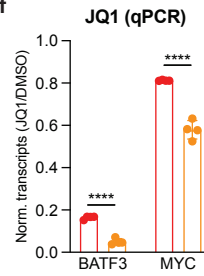**g**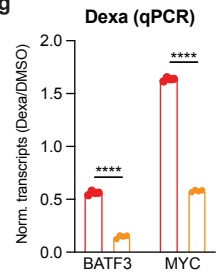

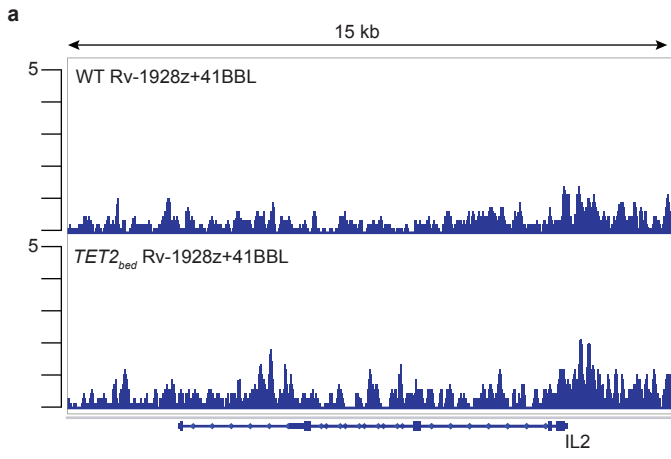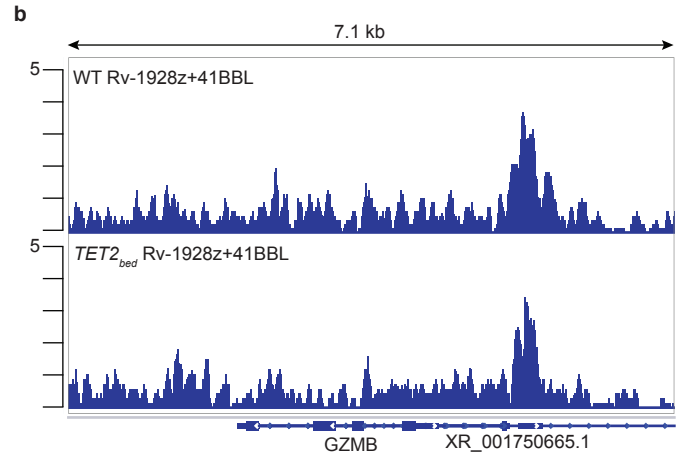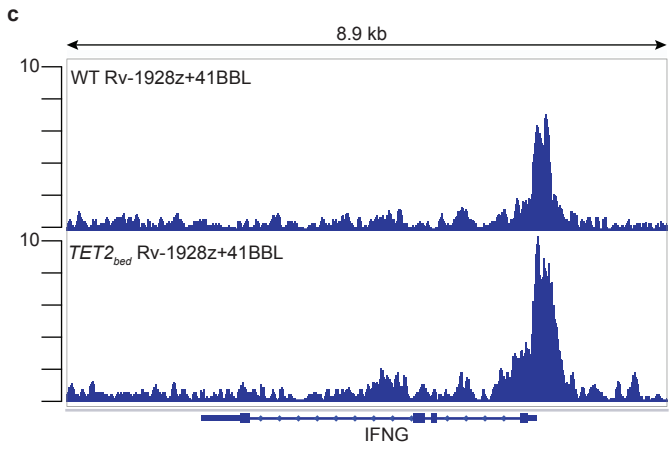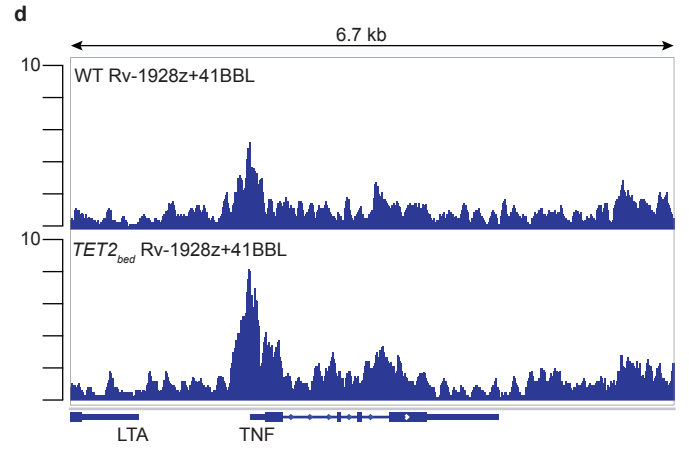

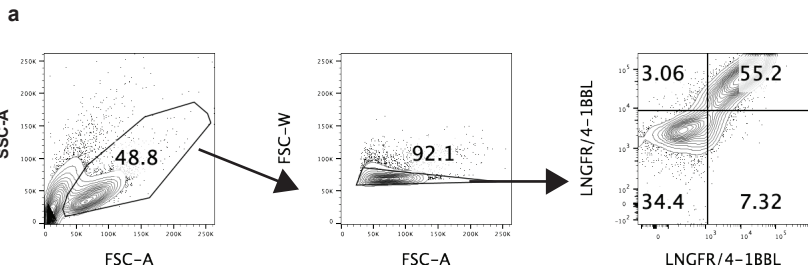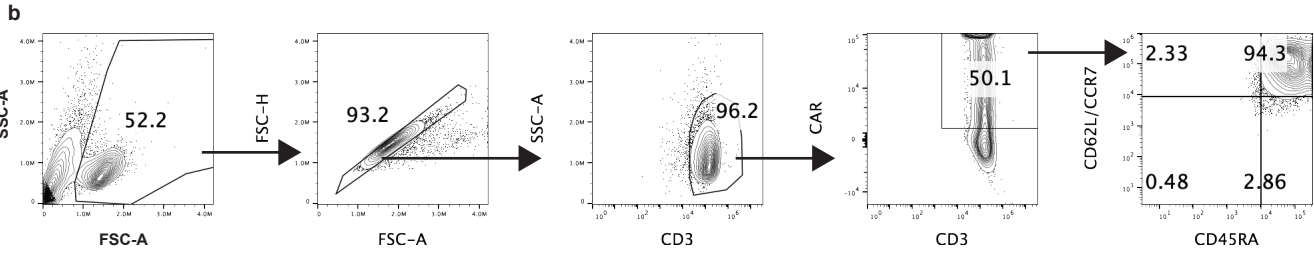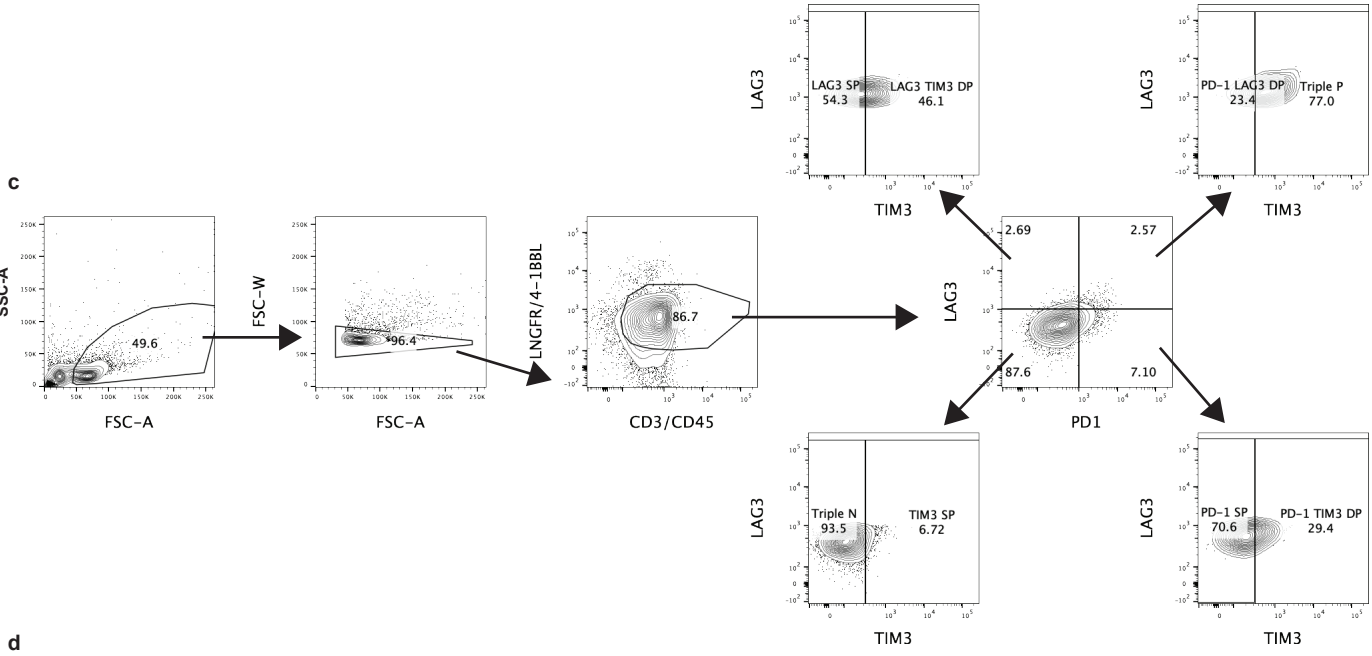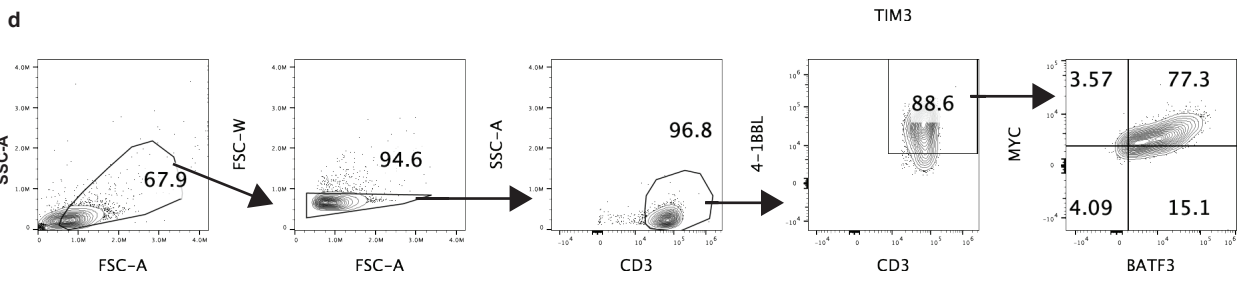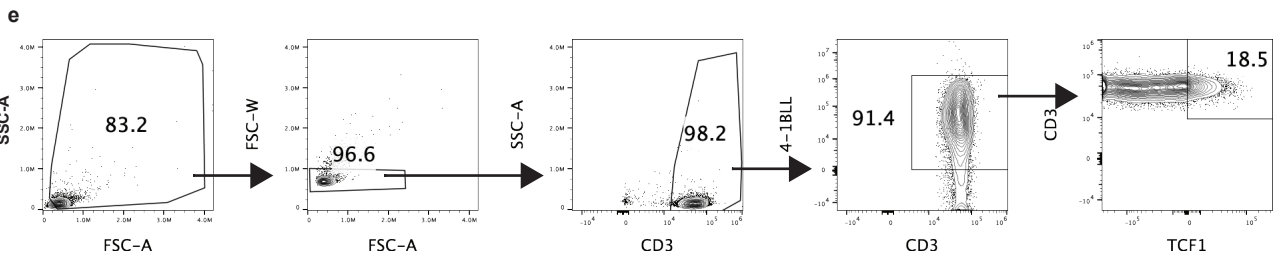

Supplement: NIHMS1915640-supplement-Suppl_Info.pdf [file NIHMS1915640-supplement-Suppl_Info.pdf]
